# Supplementary material for: Development and Validation of a Robust Ferroptosis-Related Prognostic Signature to Predict Overall Survival in Clear Cell Renal Cell Carcinoma
Source: Research Square preprint supplement (doi:10.21203/rs.3.rs-230598/v1), 2021-02-25
Supplement: Supplementary file 1 [file 2cdaed28aaadb01d28e277a5.docx]

**Table S2.** Univariate Cox regression analysis to identify prognosis-related FRGs.

| id | HR | HR.95L | HR.95H | pvalue |
| --- | --- | --- | --- | --- |
| FOXM1 | 1.699 | 1.401 | 2.061 | 7.130E-08 |
| CHAC1 | 1.660 | 1.360 | 2.027 | 6.190E-07 |
| CBS | 28.708 | 7.312 | 112.715 | 1.500E-06 |
| BID | 2.991 | 1.912 | 4.678 | 1.590E-06 |
| TAZ | 2.042 | 1.463 | 2.850 | 2.710E-05 |
| CD44 | 1.482 | 1.232 | 1.782 | 2.960E-05 |
| PSAT1 | 1.271 | 1.130 | 1.428 | 6.120E-05 |
| PRC1 | 1.912 | 1.389 | 2.631 | 6.980E-05 |
| SLC7A11 | 2.310 | 1.517 | 3.519 | 9.620E-05 |
| GOT1 | 0.633 | 0.500 | 0.800 | 1.347E-04 |
| HMGCR | 0.455 | 0.303 | 0.685 | 1.568E-04 |
| CDKN2A | 1.544 | 1.218 | 1.956 | 3.262E-04 |
| STYK1 | 2.974 | 1.574 | 5.620 | 7.868E-04 |
| EIF4A1 | 1.459 | 1.169 | 1.822 | 8.296E-04 |
| AKR1C1 | 0.701 | 0.567 | 0.866 | 1.025E-03 |
| TFAP2A | 1.396 | 1.140 | 1.710 | 1.259E-03 |
| MIOX | 0.871 | 0.798 | 0.951 | 2.014E-03 |
| PML | 2.237 | 1.309 | 3.821 | 3.226E-03 |
| CDH1 | 0.783 | 0.665 | 0.922 | 3.381E-03 |
| FDFT1 | 0.584 | 0.407 | 0.839 | 3.627E-03 |
| PEBP1 | 0.668 | 0.500 | 0.894 | 6.708E-03 |
| MYB | 2.316 | 1.244 | 4.310 | 8.054E-03 |
| ACO1 | 0.621 | 0.434 | 0.887 | 8.788E-03 |
| IFNG | 1.380 | 1.084 | 1.756 | 8.972E-03 |
| NOX4 | 0.748 | 0.598 | 0.935 | 1.067E-02 |
| PLIN2 | 0.856 | 0.758 | 0.966 | 1.209E-02 |
| ENPP2 | 0.858 | 0.760 | 0.968 | 1.314E-02 |
| TFAP2C | 1.451 | 1.079 | 1.951 | 1.384E-02 |
| MT1G | 1.099 | 1.012 | 1.192 | 2.440E-02 |
| TP63 | 3.901 | 1.163 | 13.087 | 2.751E-02 |
| EGFR | 0.783 | 0.630 | 0.973 | 2.760E-02 |
| PTGS2 | 1.164 | 1.004 | 1.351 | 4.471E-02 |

FRGs, ferroptosis-related genes.
