# Supplementary material for: Development and Validation of a Robust Ferroptosis-Related Prognostic Signature to Predict Overall Survival in Clear Cell Renal Cell Carcinoma
Source: Research Square preprint supplement (doi:10.21203/rs.3.rs-230598/v1), 2021-02-25
Supplement: Supplementary file 2 [file ff93c256d909fb78b2dcaa2e.docx]

**TableS1.** 293 ferroptosis-related genes.

| Gene symbol |
| --- |
| ABCC1 |
| ABHD12 |
| ACACB |
| ACO1 |
| ACSF2 |
| ACSL1 |
| ACSL3 |
| ACSL4 |
| ACSL5 |
| ACSL6 |
| ACVR1B |
| AHCYL1 |
| AIFM1 |
| AIFM2 |
| AKR1C1 |
| AKR1C2 |
| AKR1C3 |
| ALDH3A1 |
| ALDH3A2 |
| ALOX12 |
| ALOX12B |
| ALOX15 |
| ALOX15B |
| ALOX5 |
| ALOXE3 |
| ANGPTL4 |
| ANO6 |
| ARF |
| ARF6 |
| ARNTL |
| ATF3 |
| ATF4 |
| ATG13 |
| ATG16L1 |
| ATG3 |
| ATG4D |
| ATG5 |
| ATG7 |
| ATM |
| ATP5MC3 |
| ATRA |
| AURKA |
| BACH1 |
| BAP1 |
| BECN1 |
| BID |
| BRD4 |
| CA9 |
| CARS1 |
| CASP8 |
| CAV1 |
| CBS |
| CCL5 |
| CD44 |
| CDH1 |
| CDKN1A |
| CDKN2A |
| CDO1 |
| CFTR |
| CGAS |
| CHAC1 |
| CHMP5 |
| CHMP6 |
| CISD1 |
| CISD2 |
| COQ2 |
| CP |
| CS |
| CTSB |
| CXXC1 |
| CYBB |
| D2HGDH |
| DECR1 |
| DLD |
| DNAJB6 |
| DPP4 |
| DUOX1 |
| DUOX2 |
| EGFR |
| EGLN1 |
| EGLN2 |
| EHMT2 |
| EIF2AK2 |
| EIF2AK3 |
| EIF4A1 |
| ELAVL1 |
| EMC2 |
| EMP1 |
| ENPP2 |
| EPAS1 |
| ERN1 |
| FADS2 |
| FANCD2 |
| FBXL5 |
| FBXW7 |
| FDFT1 |
| FH |
| FLT3 |
| FOXM1 |
| FTH1 |
| FTL |
| FTMT |
| FXN |
| G3BP1 |
| G6PD |
| GABARAPL1 |
| GABARAPL2 |
| GABPB1 |
| GCH1 |
| GCLC |
| GCLM |
| GDF15 |
| GFER |
| GLS2 |
| GLUD1 |
| GOT1 |
| GPX4 |
| GSS |
| GUCY1A1 |
| HBA1 |
| HDDC3 |
| HELLS |
| HIC1 |
| HIF1A |
| HILPDA |
| HMGB1 |
| HMGCR |
| HMOX1 |
| HNF4A |
| HNRNPA1 |
| HRAS |
| HSC70 |
| HSF1 |
| HSP90 |
| HSPA5 |
| HSPB1 |
| IDH1 |
| IDH2 |
| IDO1 |
| IFNG |
| IREB2 |
| ISCU |
| ITGA6 |
| ITGB4 |
| ITGB8 |
| JUN |
| KDM3B |
| KEAP1 |
| KRAS |
| LAMP2 |
| LATS1 |
| LATS2 |
| LONP1 |
| LPCAT3 |
| LPIN1 |
| MAP1LC3A |
| MAP1LC3B |
| MAP1LC3B2 |
| MAP1LC3C |
| MAP3K5 |
| MAPK1 |
| MAPK14 |
| MAPK3 |
| MAPK8 |
| MAPK9 |
| MAPT |
| MDM2 |
| MDMX |
| MFN2 |
| MIF |
| MIOX |
| MPO |
| MT1G |
| MTDH |
| MTF1 |
| MTOR |
| MUC1 |
| MYB |
| MYC |
| NAA38 |
| NADK |
| NCOA3 |
| NCOA4 |
| NEDD4 |
| NF2 |
| NFE2L2 |
| NFS1 |
| NGB |
| NOX1 |
| NOX2 |
| NOX3 |
| NOX4 |
| NOX5 |
| NQO1 |
| NR5A2 |
| NRAS |
| OTUB1 |
| PANX1 |
| PANX2 |
| PARK7 |
| PAX3 |
| PCBP1 |
| PCBP2 |
| PEBP1 |
| PGD |
| PHKG2 |
| PIK3CA |
| PLIN2 |
| PLP1 |
| PML |
| POLG |
| POR |
| PRC1 |
| PRDX1 |
| PRDX5 |
| PRDX6 |
| PRKAA1 |
| PRKAA2 |
| PRKCA |
| PRNP |
| PROM2 |
| PSAT1 |
| PTGS2 |
| RAB7A |
| RB1 |
| RELA |
| RIPK1 |
| RNF113A |
| RNF20 |
| RPL8 |
| SAHH |
| SAT1 |
| SAT2 |
| SCD |
| SCP2 |
| SESN2 |
| SIAH2 |
| SIRT1 |
| SLC11A2 |
| SLC1A5 |
| SLC2A14 |
| SLC2A4 |
| SLC38A1 |
| SLC39A14 |
| SLC39A8 |
| SLC3A2 |
| SLC40A1 |
| SLC7A11 |
| SMAD3 |
| SMPD1 |
| SNX4 |
| SOCS1 |
| SOD2 |
| SP1 |
| SQSTM1 |
| SRC |
| STAT3 |
| STEAP3 |
| STING1 |
| STMN1 |
| STYK1 |
| TAZ |
| TF |
| TFAM |
| TFAP2A |
| TFAP2C |
| TFR2 |
| TFRC |
| TGFBR1 |
| TIGAR |
| TLR4 |
| TMBIM4 |
| TNFAIP3 |
| TP53 |
| TP63 |
| TPD52 |
| TXN |
| ULK1 |
| ULK2 |
| USP7 |
| VDAC1 |
| VDAC2 |
| VDAC3 |
| VDR |
| VHL |
| WDR76 |
| WIPI1 |
| WIPI2 |
| YAP1 |
| YWHAE |
| YY1AP1 |
| ZEB1 |
| ZFP36 |
